# Supplementary material
Source: PubMed Central journal article supplement (PMC3657781)
Supplement: 1301252110_pnas.201301252SI.pdf [file 1301252110_pnas.201301252SI.pdf]

# Supporting Information

Leung et al. 10.1073/pnas.1301252110

## SI Synthesis and Characterization

The synthetic route for binaphthol derivatives ( $n = 1, 2$  and  $3$ ) is shown in Scheme S1.

**Synthesis of L1.** To a degassed solution of 6,6'-dibromo-1,1'-bi-2-naphthol (300 mg, 0.68 mmol), potassium carbonate (560 mg, 4.08 mmol), and dry dimethylformamide (50 mL) was added a solution of 1-bromobutane (0.3 mL, 2.7 mmol). The reaction mixture was heated to reflux for 24 h. The resulting mixture was evaporated to dryness, and the residue was purified by column chromatography (70–230 mesh) using a hexane-dichloromethane mixture [10:1 (vol/vol)] as eluent to give **L1** as a pale yellow solid. The yield was as follows: 355 mg (95%).  $^1\text{H}$  NMR (400 MHz,  $\text{CDCl}_3$ , 300 K, relative to  $\text{Me}_4\text{Si}$ ):  $\delta = 8.00$  (s, 2H, naphthalene), 7.83 (d,  $^3J = 9.1$  Hz, 2H, naphthalene), 7.40 (d,  $^3J = 9.1$  Hz, 2H, naphthalene), 7.25 (dd,  $^3J = 8.8$  Hz,  $^4J = 1.6$  Hz, 2H, naphthalene), 6.96 (d,  $^3J = 8.8$  Hz, 2H, naphthalene), 3.94 (m, 4H,  $-\text{Bu}$ ), 1.37 (m, 4H,  $-\text{Bu}$ ), 1.00 (m, 4H,  $-\text{Bu}$ ), 0.65 (t,  $^3J = 7.4$  Hz, 6H,  $-\text{Bu}$ );  $^{13}\text{C}$   $\{^1\text{H}\}$  NMR (125.8 MHz,  $\text{CDCl}_3$ , 298 K, relative to  $\text{Me}_4\text{Si}$ ):  $\delta = 155.4$ , 129.7, 129.4, 128.7, 128.6, 128.4, 128.3, 123.9, 120.1, 117.6, 116.0 (C on naphthalene), 69.2, 36.5, 18.8, 13.6 (C on  $-\text{Bu}$ ); High-resolution mass spectrometry (HRMS) (positive EI)  $m/z$  found (calculated for  $\text{C}_{28}\text{H}_{28}\text{Br}_2\text{O}_2$ ): 554.0477 (554.0456).

**Synthesis of L2.** To a 100-mL two-necked round-bottomed flask fitted with a magnetic stirrer were added **L1** (320 mg, 0.58 mmol), bis(triphenylphosphine)-palladium(II) dichloride (20 mg, 0.03 mmol), tetrakis(triphenylphosphine)-palladium(0) (33 mg, 0.03 mmol), and copper(I) iodide (5 mg, 0.03 mmol). Dry tetrahydrofuran (50 mL) and triethylamine (20 mL) were then transferred to the mixture. 1-Ethynyl-3-triisopropylsilylbenzene (461 mg, 1.7 mmol) was added dropwise with a syringe. The reaction mixture was heated to reflux for 48 h. The resulting mixture was evaporated to dryness, and the residue was purified by column chromatography (70–230 mesh) using a hexane-dichloromethane mixture [10:1 (vol/vol)] as eluent to give **L2** as a pale yellow oil. The yield was as follows: 248 mg (45%).  $^1\text{H}$  NMR (400 MHz,  $\text{CDCl}_3$ , 300 K, relative to  $\text{Me}_4\text{Si}$ ):  $\delta = 8.08$  (s, 2H, naphthalene), 7.91 (d,  $^3J = 9.1$  Hz, 2H, naphthalene), 7.66 (t, 2H,  $^4J = 1.3$  Hz, 2H, phenyl), 7.46 (dt,  $^3J = 7.9$  Hz,  $^4J = 1.3$  Hz, 2H, phenyl), 7.43 (m, 4H, phenyl and naphthalene), 7.30 (dd,  $^3J = 8.8$  Hz,  $^4J = 1.6$  Hz, 2H, naphthalene), 7.29 (t,  $^3J = 7.9$  Hz, 2H, phenyl), 7.10 (d,  $^3J = 8.8$  Hz, 2H, naphthalene), 3.94 (m, 4H,  $-\text{Bu}$ ), 1.37 (m, 4H,  $-\text{Bu}$ ), 1.26 (m, 6H,  $-\text{Si}\{\text{CH}(\text{CH}_3)_2\}_3$ ), 1.00 (m, 4H,  $-\text{Bu}$ ), 1.14 (d, 36H,  $-\text{Si}\{\text{CH}(\text{CH}_3)_2\}_3$ ), 0.65 (t,  $^3J = 7.4$  Hz, 6H,  $-\text{Bu}$ );  $^{13}\text{C}$   $\{^1\text{H}\}$  NMR (125.8 MHz,  $\text{CDCl}_3$ , 298 K, relative to  $\text{Me}_4\text{Si}$ ):  $\delta = 129.7$ , 129.4, 128.7, 128.6, 128.4, 128.3, 123.9, 120.1, 117.6, 116.0 (C on naphthalene and phenyl rings), 91.5, 90.9, 89.0, 88.1 (C $\equiv$ C), 37.1 (tertiary C on  $-\text{SiPr}_3$  groups), 69.2, 36.5, 18.8, 13.6 (C on  $-\text{Bu}$ ), 11.3 (primary C on  $-\text{SiPr}_3$  groups); IR (nujol): 2,121  $\text{cm}^{-1}$   $\nu(\text{C}\equiv\text{C})$ ; HRMS (positive EI)  $m/z$  found (calculated for  $\text{C}_{66}\text{H}_{78}\text{O}_2\text{Si}_2$ ): 958.5573 (958.5540).

**Synthesis of L3.** The titled compound was prepared according to the procedure similar to that described for the preparation of **L2**, except *meta*-PE H-(C $\equiv$ C-1,3-C $_6$ H $_4$ ) $_2$ -C $\equiv$ C-SiPr $_3$  (632 mg, 1.70 mmol) was used in place of 1-ethynyl-3-triisopropylsilylbenzene to give **L3** as a pale yellow oil. The yield was as follows: 389 mg (56%).  $^1\text{H}$  NMR (400 MHz,  $\text{CDCl}_3$ , 298 K, relative to  $\text{Me}_4\text{Si}$ ):  $\delta = 8.09$  (s, 2H, naphthalene), 7.92 (d,  $^3J = 9.1$  Hz, 2H, naphthalene), 7.73 (t,  $^4J = 1.3$  Hz, 2H, phenyl), 7.66 (t,  $^4J = 1.3$  Hz, 2H, phenyl), 7.50 (dt,  $^3J = 7.9$  Hz,  $^4J = 1.3$  Hz, 2H, phenyl), 7.45 (m, 8H, phenyl and naphthalene), 7.33 (t,  $^3J = 7.9$  Hz, 2H, phenyl),

7.31 (dd,  $^3J = 8.8$  Hz,  $^4J = 1.6$  Hz, 2H, naphthalene), 7.27 (t,  $^3J = 7.9$  Hz, 2H, phenyl), 7.11 (d,  $^3J = 8.8$  Hz, 2H, naphthalene), 3.94 (m, 4H,  $-\text{Bu}$ ), 1.37 (m, 4H,  $-\text{Bu}$ ), 1.26 (m, 6H,  $-\text{Si}\{\text{CH}(\text{CH}_3)_2\}_3$ ), 1.00 (m, 4H,  $-\text{Bu}$ ), 1.14 (d, 36H,  $-\text{Si}\{\text{CH}(\text{CH}_3)_2\}_3$ ), 0.65 (t,  $^3J = 7.4$  Hz, 6H,  $-\text{Bu}$ );  $^{13}\text{C}$   $\{^1\text{H}\}$  NMR (125.8 MHz,  $\text{CDCl}_3$ , 298 K, relative to  $\text{Me}_4\text{Si}$ ):  $\delta = 155.4$ , 135.1, 134.6, 133.7, 131.9, 131.7, 131.4, 131.3, 131.1, 129.3, 128.7, 128.6, 128.5, 128.3, 125.5, 124.0, 123.9, 123.3, 123.2, 120.1, 117.6, 116.0 (C on naphthalene and phenyl rings), 91.5, 90.9, 89.2, 89.1, 88.2 (C $\equiv$ C), 37.1 (tertiary C on  $-\text{SiPr}_3$  groups), 69.4, 31.3, 18.7, 13.6 (C on  $-\text{Bu}$  groups), 11.3 (primary C on  $-\text{SiPr}_3$  groups); IR (nujol): 2,123  $\text{cm}^{-1}$   $\nu(\text{C}\equiv\text{C})$ ; HRMS (positive EI)  $m/z$  found (calculated for  $\text{C}_{82}\text{H}_{86}\text{O}_2\text{Si}_2$ ): 1,158.6113 (1,158.6166).

**Synthesis of L4.** The titled compound was prepared according to the procedure similar to that described for the preparation of **L2**, except *meta*-PE H-(C $\equiv$ C-1,3-C $_6$ H $_4$ ) $_3$ -C $\equiv$ C-SiPr $_3$  (801 mg, 1.7 mmol) was used in place of 1-ethynyl-3-triisopropylsilylbenzene to give **L4** as a pale yellow oil. The yield was as follows: 490 mg (60%).  $^1\text{H}$  NMR (400 MHz,  $\text{CDCl}_3$ , 298 K, relative to  $\text{Me}_4\text{Si}$ ):  $\delta = 8.09$  (s, 2H, naphthalene), 7.93 (d,  $^3J = 9.1$  Hz, 2H, naphthalene), 7.74 (t, 2H,  $^4J = 1.3$  Hz, 2H, phenyl), 7.72 (t,  $^4J = 1.3$  Hz, 2H, phenyl), 7.66 (t,  $^4J = 1.3$  Hz, 2H, phenyl), 7.51 (dt,  $^3J = 7.9$  Hz,  $^4J = 1.3$  Hz, 2H, phenyl), 7.45 (m, 12H, phenyl and naphthalene), 7.35 (t,  $^3J = 7.9$  Hz, 4H, phenyl), 7.32 (dd,  $^3J = 8.8$  Hz,  $^4J = 1.6$  Hz, 2H, naphthalene), 7.30 (t,  $^3J = 7.9$  Hz, 2H, phenyl), 7.12 (d,  $^3J = 8.8$  Hz, 2H, naphthalene), 3.94 (m, 4H,  $-\text{Bu}$ ), 1.37 (m, 4H,  $-\text{Bu}$ ), 1.26 (m, 6H,  $-\text{Si}\{\text{CH}(\text{CH}_3)_2\}_3$ ), 1.00 (m, 4H,  $-\text{Bu}$ ), 1.14 (d, 36H,  $-\text{Si}\{\text{CH}(\text{CH}_3)_2\}_3$ ), 0.65 (t,  $^3J = 7.4$  Hz, 6H,  $-\text{Bu}$ );  $^{13}\text{C}$   $\{^1\text{H}\}$  NMR (125.8 MHz,  $\text{CDCl}_3$ , 298 K, relative to  $\text{Me}_4\text{Si}$ ):  $\delta = 155.4$ , 135.1, 134.7, 134.6, 133.7, 131.9, 131.7, 131.5, 131.4, 131.3, 131.1, 129.3, 128.7, 128.6, 128.5, 128.3, 125.5, 124.0, 123.9, 123.5, 123.4, 123.3, 123.2, 120.1, 117.6, 116.0 (C on naphthalene and phenyl rings), 91.5, 90.9, 89.3, 89.2, 89.0, 88.9, 88.2 (C $\equiv$ C), 37.1 (tertiary C on  $-\text{SiPr}_3$  groups), 69.4, 31.3, 18.7, 13.6 (C on  $-\text{Bu}$  groups), 11.3 (primary C on  $-\text{SiPr}_3$  groups); IR (nujol): 2,120  $\text{cm}^{-1}$   $\nu(\text{C}\equiv\text{C})$ ; HRMS (positive EI)  $m/z$  found (calculated for  $\text{C}_{98}\text{H}_{94}\text{O}_2\text{Si}_2$ ): 1,358.6334 (1,358.6792).

**Synthesis of L5.** To a solution of **L2** (240 mg, 0.30 mmol) and tetrahydrofuran (200 mL) was added a solution of tetra-*n*-butylammonium fluoride (0.1 M) in tetrahydrofuran (1 mL). The solution was stirred for 15 min, and the solvent was removed. After that, the residue was purified by column chromatography (70–230 mesh) using a hexane-dichloromethane mixture [10:1 (vol/vol)] as eluent to give **L5** as a pale yellow oil. The yield was as follows: 153 mg (95%).  $^1\text{H}$  NMR (400 MHz,  $\text{CDCl}_3$ , 300 K, relative to  $\text{Me}_4\text{Si}$ ):  $\delta = 8.08$  (s, 2H, naphthalene), 7.91 (d,  $^3J = 9.1$  Hz, 2H, naphthalene), 7.66 (t,  $^4J = 1.3$  Hz, 2H, phenyl), 7.46 (dt,  $^3J = 7.9$  Hz,  $^4J = 1.3$  Hz, 2H, phenyl), 7.43 (m, 4H, phenyl and naphthalene), 7.30 (dd,  $^3J = 8.8$  Hz,  $^4J = 1.6$  Hz, 2H, naphthalene), 7.29 (t,  $^3J = 7.9$  Hz, 2H, phenyl), 7.10 (d,  $^3J = 8.8$  Hz, 2H, naphthalene), 3.94 (m, 4H,  $-\text{Bu}$ ), 3.10 (s, 2H,  $-\text{C}\equiv\text{CH}$ ), 1.37 (m, 4H,  $-\text{Bu}$ ), 1.00 (m, 4H,  $-\text{Bu}$ ), 0.65 (t,  $^3J = 7.4$  Hz, 6H,  $-\text{Bu}$ );  $^{13}\text{C}$   $\{^1\text{H}\}$  NMR (125.8 MHz,  $\text{CDCl}_3$ , 298 K, relative to  $\text{Me}_4\text{Si}$ ):  $\delta = 155.4$ , 135.1, 133.7, 131.8, 131.6, 129.3, 128.7, 128.6, 128.4, 125.5, 124.0, 122.6, 120.1, 117.6, 116.0 (C on naphthalene and phenyl rings), 90.9, 88.0, 82.9 (C $\equiv$ C), 69.4, 31.6, 18.7, 13.5 (C on  $-\text{Bu}$  group); IR (nujol): 2,122  $\text{cm}^{-1}$   $\nu(\text{C}\equiv\text{C})$ ; HRMS (positive EI)  $m/z$  found (calculated for  $\text{C}_{48}\text{H}_{38}\text{O}_2$ ): 646.2898 (646.2872).

**Synthesis of L6.** The titled compound was prepared according to the procedure similar to that described for the preparation of **L5**, except **L4** (348 mg, 0.30 mmol) was used in place of **L2** to give **L6** as a pale yellow oil. The yield was as follows: 251 mg (99%).  $^1\text{H}$  NMR (400 MHz,  $\text{CDCl}_3$ , 298 K, relative to  $\text{Me}_4\text{Si}$ ):  $\delta$  = 8.09 (s, 2H, naphthalene), 7.93 (d,  $^3J$  = 9.1 Hz, 2H, naphthalene), 7.73 (t,  $^4J$  = 1.3 Hz, 2H, phenyl), 7.66 (t,  $^4J$  = 1.3 Hz, 2H, phenyl), 7.45 (m, 10H, phenyl and naphthalene), 7.34 (t,  $^3J$  = 7.9 Hz, 2H, phenyl), 7.32 (dd,  $^3J$  = 8.8 Hz,  $^4J$  = 1.6 Hz, 2H, naphthalene), 7.28 (t,  $^3J$  = 7.9 Hz, 2H, phenyl), 7.12 (d,  $^3J$  = 8.8 Hz, 2H, naphthalene), 3.96 (m, 4H,  $-\text{nBu}$ ), 3.10 (s, 2H,  $-\text{C}\equiv\text{CH}$ ), 1.42 (m, 4H,  $-\text{nBu}$ ), 1.02 (m, 4H,  $-\text{nBu}$ ), 0.66 (t,  $^3J$  = 7.4 Hz, 6H,  $-\text{nBu}$ );  $^{13}\text{C}$   $\{^1\text{H}\}$  NMR (125.8 MHz,  $\text{CDCl}_3$ , 298 K, relative to  $\text{Me}_4\text{Si}$ ):  $\delta$  = 155.4, 135.2, 134.6, 133.7, 131.9, 131.9, 131.7, 131.5, 131.1, 129.3, 128.7, 128.6, 128.5, 128.4, 125.5, 124.0, 123.5, 123.3, 123.2, 120.1, 117.6, 116.0 (C on naphthalene and phenyl rings), 90.9, 89.3, 88.8, 88.2 (C $\equiv$ C), 69.3, 31.3, 18.7, 13.6 (C on  $-\text{nBu}$  groups); IR (nujol): 2,122  $\text{cm}^{-1}$   $\nu(\text{C}\equiv\text{C})$ ; HRMS (positive EI)  $m/z$  found (calcd for  $\text{C}_{64}\text{H}_{46}\text{O}_2$ ): 846.3434 (846.3498).

**Synthesis of L7.** The titled compound was prepared according to the procedure similar to that described for the preparation of **L5**, except **L3** (408 mg, 0.3 mmol) was used in place of **L2** to give **L7** as a pale yellow oil. The yield was as follows: 310 mg (99%).  $^1\text{H}$  NMR (400 MHz,  $\text{CDCl}_3$ , 298 K, relative to  $\text{Me}_4\text{Si}$ ):  $\delta$  = 8.09 (s, 2H, naphthalene), 7.93 (d,  $^3J$  = 9.1 Hz, 2H, naphthalene), 7.74 (t,  $^4J$  = 1.3 Hz, 2H, phenyl), 7.72 (t,  $^4J$  = 1.3 Hz, 2H, phenyl), 7.66 (t,  $^4J$  = 1.3 Hz, 2H, phenyl), 7.51 (dt,  $^3J$  = 7.9 Hz,  $^4J$  = 1.3 Hz, 2H, phenyl), 7.45 (m, 12H, phenyl and naphthalene), 7.35 (t,  $^3J$  = 7.9 Hz, 4H, phenyl), 7.32 (dd,  $^3J$  = 8.8 Hz,  $^4J$  = 1.6 Hz, 2H, naphthalene), 7.30 (t,  $^3J$  = 7.9 Hz, 2H, phenyl), 7.12 (d,  $^3J$  = 8.8 Hz, 2H, naphthalene), 3.10 (s, 2H,  $-\text{C}\equiv\text{CH}$ ), 3.94 (m, 4H,  $-\text{nBu}$ ), 1.37 (m, 4H,  $-\text{nBu}$ ), 1.00 (m, 4H,  $-\text{nBu}$ ), 0.65 (t,  $^3J$  = 7.4 Hz, 6H,  $-\text{nBu}$ );  $^{13}\text{C}$   $\{^1\text{H}\}$  NMR (125.8 MHz,  $\text{CDCl}_3$ , 298 K, relative to  $\text{Me}_4\text{Si}$ ):  $\delta$  = 155.4, 135.1, 134.7, 134.6, 133.7, 131.9, 131.7, 131.5, 131.4, 131.3, 131.1, 129.3, 128.7, 128.6, 128.5, 128.3, 125.5, 124.0, 123.9, 123.5, 123.4, 123.3, 123.2, 120.1, 117.6, 116.0 (C on naphthalene and phenyl rings), 90.9, 89.3, 89.2, 89.0, 88.9, 88.2, 82.7 (C $\equiv$ C), 69.4, 31.3, 18.7, 13.6 (C on  $-\text{nBu}$  groups); IR (nujol): 2,120  $\text{cm}^{-1}$   $\nu(\text{C}\equiv\text{C})$ ; HRMS (positive EI)  $m/z$  found (calcd for  $\text{C}_{80}\text{H}_{54}\text{O}_2\text{Si}_2$ ): 1,046.4532 (1,046.4124).

**Synthesis of 1.** To a solution of **L5** (30 mg, 0.05 mmol) and  $[(^t\text{Bu}_3\text{tpy})\text{PtCl}](\text{OTf})_2$  (78 mg, 0.10 mmol) in degassed *N,N*-dimethylformamide (30 mL) containing triethylamine (5 mL) was added a catalytic amount of CuI. The solution was stirred overnight at room temperature. After removing the solvent, the reaction mixture was purified by chromatography on silica gel using a dichloromethane-acetone mixture [10:1 (vol/vol)] as eluent, followed by the diffusion of diethyl ether vapor into an acetonitrile solution to give **1** as a yellow solid. The yield was as follows: 73 mg (68%).  $^1\text{H}$  NMR (500 MHz,  $\text{CDCl}_3$ , 298 K, relative to  $\text{Me}_4\text{Si}$ ):  $\delta$  = 9.15 (d with Pt satellites,  $^3J$  = 6.0 Hz, 4H, terpyridyl), 8.45 (s, 4H, terpyridyl), 8.38 (d,  $^4J$  = 1.6 Hz, 4H, terpyridyl), 8.09 (s, 2H, naphthalene), 7.93 (d,  $^3J$  = 9.1 Hz, 2H, naphthalene), 7.70 (t,  $^4J$  = 1.3 Hz, 2H, phenyl), 7.62 (dd,  $^3J$  = 6.0 Hz,  $^4J$  = 1.6 Hz, 4H, terpyridyl), 7.43 (m, 6H, phenyl and naphthalene), 7.31 (m, 4H, phenyl and naphthalene), 7.10 (d,  $^3J$  = 8.8 Hz, 2H, naphthalene), 3.97 (m, 4H,  $-\text{nBu}$ ), 1.42 (m, 4H,  $-\text{nBu}$ ), 0.88 (m, 4H,  $-\text{nBu}$ ), 0.68 (t,  $^3J$  = 7.4 Hz, 6H,  $-\text{nBu}$ );  $^{13}\text{C}$   $\{^1\text{H}\}$  NMR (125.8 MHz,  $\text{CDCl}_3$ , 298 K, relative to  $\text{Me}_4\text{Si}$ ):  $\delta$  = 168.7, 167.5, 158.8, 155.5 (quaternary C on terpyridyl), 154.0 (tertiary C on terpyridyl), 153.9, 135.1,

133.7, 131.6, 131.5, 129.7, 129.2, 128.7, 128.6, 128.3, 125.5, 125.4, 121.7, 120.1, 117.8, 116.0 (C on naphthalene and phenyl rings), 126.8, 123.5, 123.1 (tertiary C on terpyridyl), 103.8 (Pt–C $\equiv$ C), 98.2 (Pt–C $\equiv$ C), 90.4, 88.8 (C $\equiv$ C), 38.8, 37.5 (quaternary C on  $-\text{nBu}$ ), 30.5, 30.2 (primary C on  $-\text{nBu}$ ), 69.2, 36.5, 18.8, 13.6 (C on  $-\text{nBu}$ ); IR (nujol): 2121  $\text{cm}^{-1}$   $\nu(\text{C}\equiv\text{C})$ ; positive FAB-atom bombardment (FAB)-MS: ion clusters at  $m/z$  920.1  $[\text{M}-2\text{OTf}]^{2+}$ ; elemental analyses calculated (%) for  $\text{C}_{104}\text{H}_{106}\text{F}_6\text{N}_6\text{O}_8\text{Pt}_2\text{S}_2$ : C, 58.47; H, 5.00; N, 3.93; found: C, 58.37; H, 5.13; N, 3.79.

**Synthesis of 2.** The titled complex was prepared according to a procedure similar to that described for the preparation of **1**, except **L6** (42 mg, 0.05 mmol) was used in place of **L5**. The yield was as follows: 85 mg (73%).  $^1\text{H}$  NMR (500 MHz,  $\text{CDCl}_3$ , 298 K, relative to  $\text{Me}_4\text{Si}$ ):  $\delta$  = 9.15 (d with Pt satellites,  $^3J$  = 6.0 Hz, 4H, terpyridyl), 8.45 (s, 4H, terpyridyl), 8.38 (d,  $^4J$  = 1.6 Hz, 4H, terpyridyl), 8.09 (s, 2H, naphthalene), 7.93 (d,  $^3J$  = 9.1 Hz, 2H, naphthalene), 7.74 (t,  $^4J$  = 1.3 Hz, 2H, phenyl), 7.68 (t,  $^4J$  = 1.3 Hz, 2H, phenyl), 7.62 (dd,  $^3J$  = 6.0 Hz,  $^4J$  = 1.6 Hz, 4H, terpyridyl), 7.49 (m, 10H, phenyl and naphthalene), 7.31 (m, 6H, phenyl and naphthalene), 7.10 (d,  $^3J$  = 8.8 Hz, 2H, naphthalene), 3.97 (m, 4H,  $-\text{nBu}$ ), 1.42 (m, 4H,  $-\text{nBu}$ ), 0.88 (m, 4H,  $-\text{nBu}$ ), 0.68 (t,  $^3J$  = 7.4 Hz, 6H,  $-\text{nBu}$ );  $^{13}\text{C}$   $\{^1\text{H}\}$  NMR (125.8 MHz,  $\text{CDCl}_3$ , 298 K, relative to  $\text{Me}_4\text{Si}$ ):  $\delta$  = 168.7, 167.5, 158.8, 155.5 (quaternary C on terpyridyl), 154.0 (tertiary C on terpyridyl), 153.9, 135.0, 134.6, 133.7, 131.9, 131.4, 131.1, 129.7, 129.2, 128.7, 128.6, 128.4, 125.5, 125.4, 124.0, 123.5, 123.1, 123.0, 121.7, 120.0, 117.6, 116.0 (C on naphthalene and phenyl rings), 126.8, 123.5, 123.1 (tertiary C on terpyridyl), 103.6 (Pt–C $\equiv$ C), 98.6 (Pt–C $\equiv$ C), 90.9, 89.7, 88.8, 88.2 (C $\equiv$ C), 38.8, 37.5 (quaternary C on  $-\text{nBu}$ ), 30.5, 30.2 (primary C on  $-\text{nBu}$ ), 69.2, 36.5, 18.8, 13.6 (C on  $-\text{nBu}$ ); IR (nujol): 2123  $\text{cm}^{-1}$   $\nu(\text{C}\equiv\text{C})$ ; Positive FAB-MS: ion clusters at  $m/z$  1020  $[\text{M}-2\text{OTf}]^{2+}$ ; elemental analyses calculated (%) for  $\text{C}_{120}\text{H}_{114}\text{F}_6\text{N}_6\text{O}_8\text{Pt}_2\text{S}_2$ : C, 61.69; H, 4.92; N, 3.60; found: C, 61.97; H, 4.92; N, 3.50.

**Synthesis of 3.** The titled complex was prepared according to a procedure similar to that described for the preparation of **1**, except **L7** (89 mg, 0.05 mmol) was used in place of **L5**. The yield was as follows: 80 mg (70%).  $^1\text{H}$  NMR (500 MHz,  $\text{CDCl}_3$ , 298 K, relative to  $\text{Me}_4\text{Si}$ ):  $\delta$  = 9.15 (d with Pt satellites,  $^3J$  = 6.0 Hz, 4H, terpyridyl), 8.45 (s, 4H, terpyridyl), 8.38 (d,  $^4J$  = 1.6 Hz, 4H, terpyridyl), 8.09 (s, 2H, naphthalene), 7.93 (d,  $^3J$  = 9.1 Hz, 2H, phenyl), 7.72 (t,  $^4J$  = 1.3 Hz, 2H, phenyl), 7.70 (m, 4H, phenyl), 7.62 (dd,  $^3J$  = 6.0 Hz,  $^4J$  = 1.6 Hz, 4H, terpyridyl), 7.48 (m, 14H, phenyl and naphthalene), 7.40 (m, 8H, phenyl and naphthalene), 7.10 (d,  $^3J$  = 8.8 Hz, 2H, naphthalene), 3.97 (m, 4H,  $-\text{nBu}$ ), 1.42 (m, 4H,  $-\text{nBu}$ ), 0.88 (m, 4H,  $-\text{nBu}$ ), 0.68 (t,  $^3J$  = 7.4 Hz, 6H,  $-\text{nBu}$ );  $^{13}\text{C}$   $\{^1\text{H}\}$  NMR (125.8 MHz,  $\text{CDCl}_3$ , 298 K, relative to  $\text{Me}_4\text{Si}$ ):  $\delta$  = 168.7, 167.5, 158.8, 155.5 (quaternary C on terpyridyl), 154.0 (tertiary C on terpyridyl), 153.9, 135.0, 134.6, 133.7, 131.9, 131.4, 131.1, 129.7, 129.2, 128.7, 128.6, 128.4, 125.5, 125.4, 124.0, 123.5, 123.1, 123.0, 121.7, 120.0, 117.6, 116.0 (C on naphthalene and phenyl ring), 126.8, 123.5, 123.1 (tertiary C on terpyridyl), 103.6 (Pt–C $\equiv$ C), 98.6 (Pt–C $\equiv$ C), 90.9, 89.7, 88.8, 88.2 (C $\equiv$ C), 38.8, 37.5 (quaternary C on  $-\text{nBu}$ ), 30.5, 30.2 (primary C on  $-\text{nBu}$ ), 69.2, 36.5, 18.8, 13.6 (C on  $-\text{nBu}$ ); IR (nujol): 2122  $\text{cm}^{-1}$   $\nu(\text{C}\equiv\text{C})$ ; Positive FAB-MS: ion clusters at  $m/z$  1120  $[\text{M}-2\text{OTf}]^{2+}$ ; elemental analyses calculated (%) for  $\text{C}_{136}\text{H}_{122}\text{F}_6\text{N}_6\text{O}_8\text{Pt}_2\text{S}_2$ : C, 64.39; H, 4.85; N, 3.31; found: C, 64.57; H, 4.90; N, 3.33.

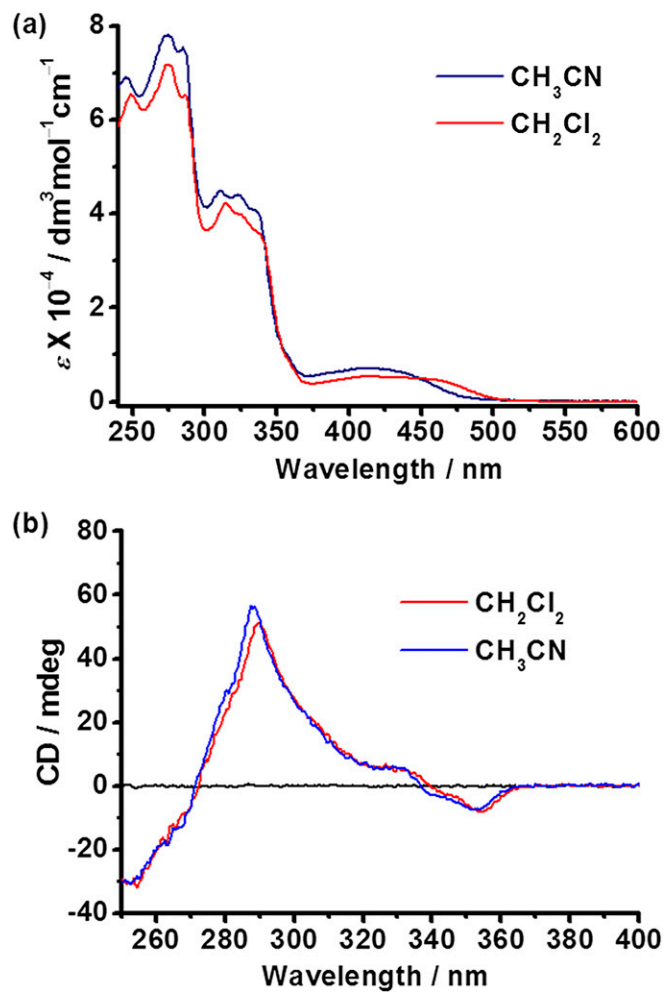

Fig. S1. Fig. S1(A) UV-vis absorption spectra of *rac*-1 in  $\text{CH}_2\text{Cl}_2$  (red line) and  $\text{CH}_3\text{CN}$  (blue line) at 298 K. (B) CD spectra of *(S)*-1 in  $\text{CH}_2\text{Cl}_2$  (red line) and  $\text{CH}_3\text{CN}$  (blue line) at 298 K.

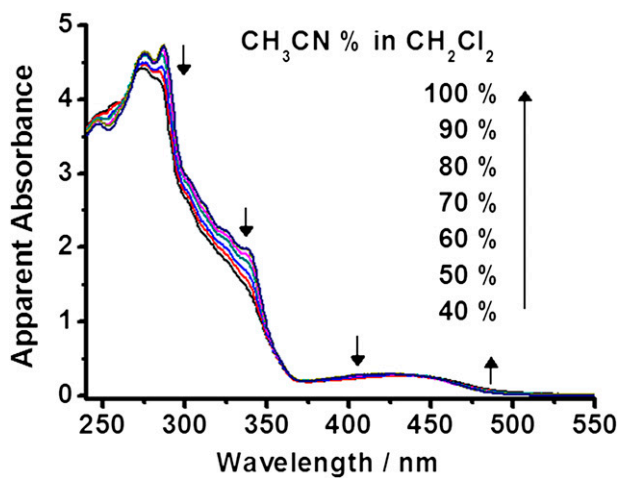

Fig. S2. UV-vis absorption spectral traces of *rac*-2 in  $\text{CH}_2\text{Cl}_2$  ( $2.4 \times 10^{-5}$  M) with 40%  $\text{CH}_3\text{CN}$  content onward at 298 K.

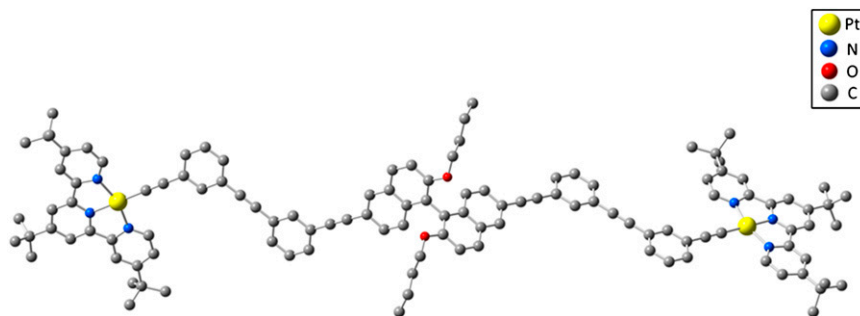

Fig. S3. Optimized structure of the all-*transoid* conformation in (*S*)-2. The hydrogen atoms are omitted for clarity.

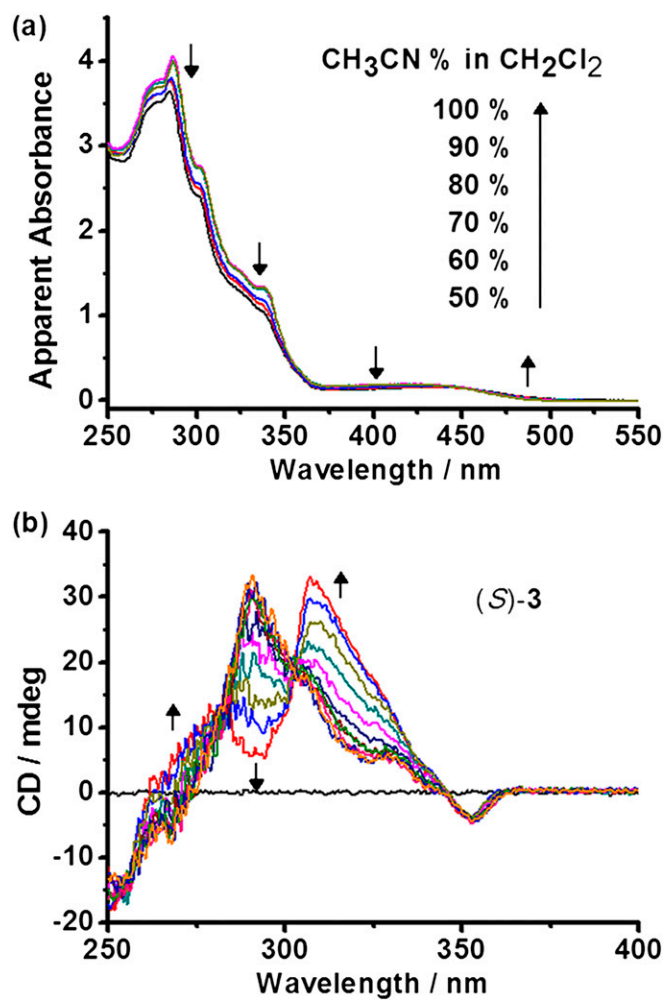

Fig. S4. (A) UV-vis absorption spectral traces of *rac*-3 in  $\text{CH}_2\text{Cl}_2$  ( $2.0 \times 10^{-5}$  M) with 50%  $\text{CH}_3\text{CN}$  content onward at 298 K. (B) CD spectral traces of (*S*)-3 in  $\text{CH}_2\text{Cl}_2$  ( $1.9 \times 10^{-5}$  M) with increasing  $\text{CH}_3\text{CN}$  content at 298 K.





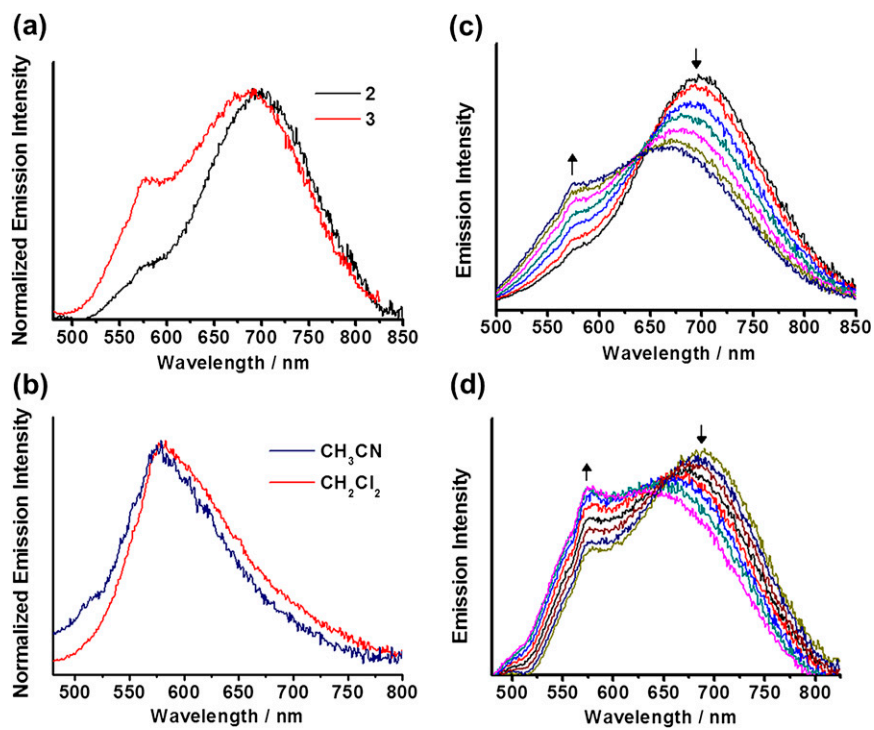

**Fig. S7.** (A) Emission spectra of *rac-2* (black line) and *rac-3* (red line) in  $\text{CH}_3\text{CN}$  at 298 K. (B) Emission spectra of *rac-1* in  $\text{CH}_2\text{Cl}_2$  (red line) and  $\text{CH}_3\text{CN}$  (blue line) at 298 K. (C) Emission spectral traces of *rac-2* ( $2.0 \times 10^{-5}$  M) with increasing temperature in  $\text{CH}_3\text{CN}$  from 283 to 343 K. (D) Emission spectral traces of *rac-3* ( $2.4 \times 10^{-5}$  M) with increasing temperature in  $\text{CH}_3\text{CN}$  from 283 to 343 K.

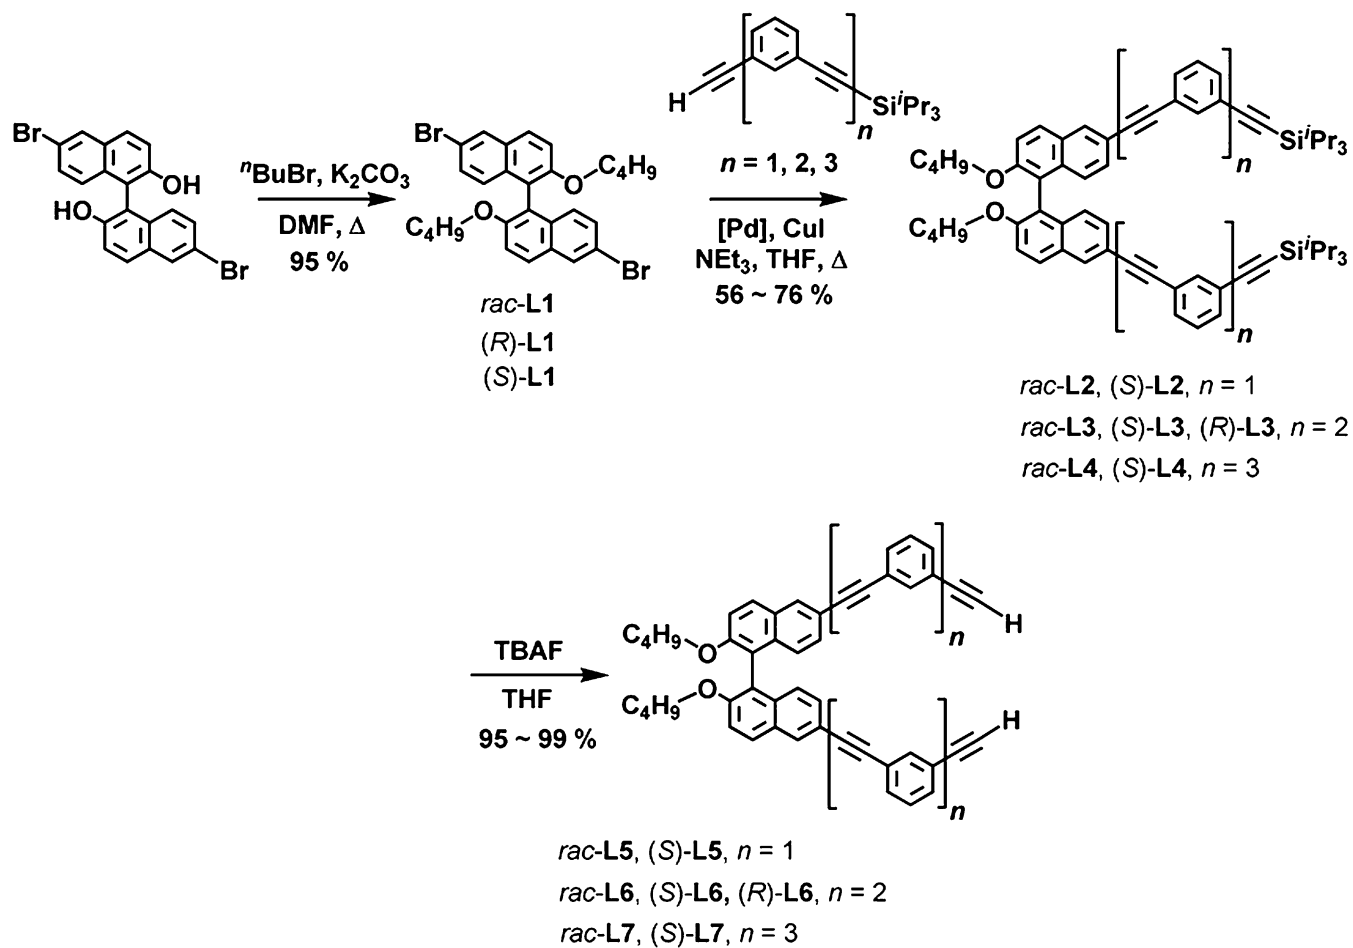

Scheme S1. Synthetic route for binaphthol derivatives ( $n = 1, 2, \text{ and } 3$ ).

**Table S1. Cartesian coordinates for selected optimized geometries**

| No.                       | Atom | X         | Y         | Z         | No. Atom | X  | Y          | Z         | No. Atom  | X   | Y  | Z          |           |           |
|---------------------------|------|-----------|-----------|-----------|----------|----|------------|-----------|-----------|-----|----|------------|-----------|-----------|
| Folded structure of (S)-2 |      |           |           |           |          |    |            |           |           |     |    |            |           |           |
| 1                         | C    | 10.746581 | -1.317701 | -3.220875 | 82       | H  | 3.564472   | 2.297110  | 6.412483  | 163 | H  | -12.634027 | 1.887156  | 2.305936  |
| 2                         | C    | 11.750382 | -2.253570 | -3.048990 | 83       | C  | 3.769943   | -0.833644 | -4.141704 | 164 | H  | -11.698131 | 0.412053  | 2.063188  |
| 3                         | C    | 12.818464 | -2.017631 | -2.154481 | 84       | C  | 2.927784   | -0.304235 | -3.442894 | 165 | H  | -11.256369 | 1.537699  | 3.372475  |
| 4                         | C    | 12.868927 | -0.800432 | -1.408538 | 85       | C  | 3.770971   | 0.835961  | 4.141043  | 166 | H  | -3.700649  | 7.844644  | -1.348912 |
| 5                         | C    | 11.866389 | 0.175573  | -1.665043 | 86       | C  | 2.928985   | 0.306683  | 3.441925  | 167 | H  | -2.785840  | 6.326693  | -1.230567 |
| 6                         | C    | 10.839608 | -0.072916 | -2.532437 | 87       | C  | 2.000885   | 0.342155  | -2.574404 | 168 | H  | -4.418391  | 6.330997  | -1.942032 |
| 7                         | H    | 13.799495 | -3.910428 | -2.514466 | 88       | C  | 2.487089   | 1.209077  | -1.581193 | 169 | H  | -3.944450  | 7.054288  | 2.305256  |
| 8                         | H    | 11.706857 | -3.206285 | -3.577507 | 89       | C  | 0.623262   | 0.110776  | -2.677992 | 170 | H  | -2.502196  | 6.838485  | 1.285101  |
| 9                         | C    | 13.826169 | -2.985473 | -1.938358 | 90       | C  | 1.601172   | 1.839022  | -0.716964 | 171 | H  | -3.495555  | 8.297014  | 1.115399  |
| 10                        | C    | 13.877523 | -0.609876 | -0.424837 | 91       | H  | 3.559290   | 1.378865  | -1.499601 | 172 | H  | -6.459031  | 6.787396  | -0.504339 |
| 11                        | H    | 11.911495 | 1.131991  | -1.147641 | 92       | C  | -0.271747  | 0.739170  | -1.802227 | 173 | H  | -6.273151  | 7.089243  | 1.242493  |
| 12                        | H    | 10.066068 | 0.675468  | -2.697970 | 93       | H  | 0.246105   | -0.570710 | -3.439459 | 174 | H  | -5.682931  | 8.275067  | 0.062164  |
| 13                        | C    | 14.833646 | -1.602239 | -0.228542 | 94       | C  | 0.234689   | 1.612460  | -0.823263 | 175 | C  | -1.672959  | 0.460328  | -1.853133 |
| 14                        | C    | 14.813244 | -2.785923 | -1.008118 | 95       | H  | 1.980172   | 2.509674  | 0.052602  | 176 | C  | -2.872331  | 0.197505  | -1.803946 |
| 15                        | H    | 15.565775 | -3.556188 | -0.859287 | 96       | C  | 2.002252   | -0.339608 | 2.573188  | 177 | Pt | -4.772696  | -0.345909 | -1.638749 |
| 16                        | C    | 13.877798 | 0.609680  | 0.425119  | 97       | C  | 0.624611   | -0.108265 | 2.676641  | 178 | N  | -5.733304  | 1.395019  | -2.142906 |
| 17                        | C    | 14.834256 | 1.601695  | 0.228675  | 98       | C  | 2.488575   | -1.206432 | 1.579954  | 179 | N  | -6.668491  | -0.943185 | -1.518745 |
| 18                        | C    | 12.869410 | 0.800620  | 1.408953  | 99       | C  | -0.270289  | -0.736593 | 1.800718  | 180 | N  | -4.505019  | -2.313341 | -1.113580 |
| 19                        | C    | 14.814368 | 2.785415  | 1.008206  | 100      | H  | 0.247348   | 0.573100  | 3.438162  | 181 | C  | -5.182959  | 2.571141  | -2.456461 |
| 20                        | C    | 12.819460 | 2.017873  | 2.154842  | 101      | C  | 1.602761   | -1.836329 | 0.715582  | 182 | C  | -7.101996  | 1.288779  | -2.113402 |
| 21                        | C    | 11.866571 | -0.175030 | 1.665636  | 102      | H  | 3.560783   | -1.376233 | 1.498489  | 183 | C  | -7.633426  | -0.051097 | -1.785847 |
| 22                        | C    | 13.827474 | 2.985353  | 1.938556  | 103      | C  | 0.236262   | -1.609767 | 0.821713  | 184 | C  | -6.908589  | -2.229552 | -1.224424 |
| 23                        | H    | 15.567150 | 3.555409  | 0.859251  | 104      | H  | 1.981860   | -2.506921 | -0.053989 | 185 | C  | -5.675876  | -3.010182 | -0.997797 |
| 24                        | C    | 11.751551 | 2.254237  | 3.049446  | 105      | H  | -0.456449  | -2.101012 | 0.138941  | 186 | C  | -3.346942  | -2.953241 | -0.909754 |
| 25                        | C    | 10.839970 | 0.073866  | 2.533126  | 106      | H  | -0.458095  | 2.103754  | -0.140607 | 187 | C  | -5.946161  | 3.694743  | -2.742284 |
| 26                        | H    | 11.911285 | -1.131490 | 1.148277  | 107      | C  | -1.671532  | -0.457949 | 1.851654  | 188 | H  | -4.095563  | 2.602579  | -2.473328 |
| 27                        | H    | 13.801182 | 3.910348  | 2.514617  | 108      | C  | -2.871012  | -0.195577 | 1.802712  | 189 | C  | -7.899719  | 2.385882  | -2.376828 |
| 28                        | C    | 10.747439 | 1.318736  | 3.221491  | 109      | Pt | -4.771800  | 0.346516  | 1.638201  | 190 | C  | -8.960877  | -0.459738 | -1.748808 |
| 29                        | H    | 11.708408 | 3.207013  | 3.577886  | 110      | N  | -5.730723  | -1.395205 | 2.142810  | 191 | C  | -8.220842  | -2.679602 | -1.174478 |
| 30                        | H    | 10.066192 | -0.674242 | 2.698794  | 111      | N  | -6.668133  | 0.942282  | 1.519145  | 192 | C  | -5.671687  | -4.363669 | -0.697484 |
| 31                        | O    | 15.751465 | -1.365857 | 0.732749  | 112      | N  | -4.506008  | 2.314166  | 1.112779  | 193 | C  | -3.293825  | -4.301806 | -0.605134 |
| 32                        | O    | 15.751885 | 1.364945  | -0.732710 | 113      | C  | -5.179313  | -2.570978 | 2.455806  | 194 | H  | -2.447443  | -2.350721 | -1.013204 |
| 33                        | C    | 9.579336  | -1.578555 | -3.993293 | 114      | C  | -7.099511  | -1.290020 | 2.114085  | 195 | C  | -7.337798  | 3.629427  | -2.703404 |
| 34                        | C    | 8.517414  | -1.743142 | -4.563231 | 115      | C  | -7.632187  | 0.049471  | 1.787019  | 196 | H  | -5.422962  | 4.611665  | -2.998934 |
| 35                        | C    | 9.580305  | 1.580044  | 3.993918  | 116      | C  | -6.909441  | 2.228454  | 1.224988  | 197 | H  | -8.981256  | 2.269407  | -2.331776 |
| 36                        | C    | 8.518396  | 1.744885  | 4.563806  | 117      | C  | -5.677490  | 3.010035  | 0.997468  | 198 | C  | -9.274949  | -1.794991 | -1.448001 |
| 37                        | C    | 16.738119 | -2.345544 | 1.045336  | 118      | C  | -3.348561  | 2.954986  | 0.908264  | 199 | H  | -9.746768  | 0.256156  | -1.974709 |
| 38                        | H    | 17.190910 | -2.745408 | 0.124677  | 119      | C  | -5.941496  | -3.695237 | 2.741796  | 200 | H  | -8.419837  | -3.722482 | -0.938210 |
| 39                        | H    | 17.524183 | -1.786520 | 1.569196  | 120      | H  | -4.091883  | -2.601612 | 2.472008  | 201 | C  | -4.469105  | -5.053803 | -0.512955 |
| 40                        | C    | 16.738784 | 2.344316  | -1.045515 | 121      | C  | -7.896238  | -2.387789 | 2.377704  | 202 | H  | -6.625522  | -4.880689 | -0.625541 |
| 41                        | H    | 17.191873 | 2.744062  | -0.124951 | 122      | C  | -8.959974  | 0.457103  | 1.751152  | 203 | H  | -2.317524  | -4.759329 | -0.460651 |
| 42                        | H    | 17.524577 | 1.785034  | -1.569507 | 123      | C  | -8.222082  | 2.677496  | 1.176137  | 204 | C  | -8.235104  | 4.826132  | -2.969977 |
| 43                        | C    | 16.205369 | 3.448433  | -1.933438 | 124      | C  | -5.674552  | 4.363448  | 0.696793  | 205 | C  | -10.723570 | -2.266861 | -1.374927 |
| 44                        | H    | 15.792385 | 2.996995  | -2.849354 | 125      | C  | -3.296676  | 4.303530  | 0.603334  | 206 | C  | -4.404994  | -6.546458 | -0.233764 |
| 45                        | H    | 15.370290 | 3.967550  | -1.436351 | 126      | H  | -2.448519  | 2.353227  | 1.011392  | 207 | C  | -8.959878  | 5.185672  | -1.666058 |
| 46                        | C    | 16.204517 | -3.449513 | 1.933331  | 127      | C  | -7.333207  | -3.630969 | 2.703735  | 208 | C  | -9.266397  | 4.467715  | -4.045249 |
| 47                        | H    | 15.791840 | -2.997961 | 2.849329  | 128      | H  | -5.417422  | -4.611835 | 2.997841  | 209 | C  | -7.441946  | 6.040110  | -3.443278 |
| 48                        | H    | 15.369183 | -3.968350 | 1.436381  | 129      | H  | -8.977889  | -2.272123 | 2.333264  | 210 | C  | -10.847895 | -3.752043 | -1.722228 |
| 49                        | C    | 17.292036 | 4.452868  | -2.288430 | 130      | C  | -9.275294  | 1.792127  | 1.450611  | 211 | C  | -11.217682 | -2.051355 | 0.062011  |
| 50                        | H    | 18.130347 | 3.927352  | -2.773586 | 131      | H  | -9.745092  | -0.259410 | 1.977752  | 212 | C  | -11.618381 | -1.476938 | -2.331713 |
| 51                        | H    | 17.700192 | 4.888832  | -1.362148 | 132      | H  | -8.422068  | 3.720221  | 0.940038  | 213 | C  | -3.782482  | -6.766517 | 1.149249  |
| 52                        | C    | 17.290925 | -4.454300 | 2.288115  | 133      | C  | -4.472627  | 5.054526  | 0.511479  | 214 | C  | -3.528995  | -7.212365 | -1.301914 |
| 53                        | H    | 18.129490 | -3.929059 | 2.773129  | 134      | H  | -6.628821  | 4.879712  | 0.625183  | 215 | C  | -5.781921  | -7.200854 | -0.263751 |
| 54                        | H    | 17.698779 | -4.890385 | 1.361756  | 135      | H  | -2.320799  | 4.761811  | 0.458330  | 216 | H  | -8.243713  | 5.409147  | -0.859629 |
| 55                        | C    | 16.778514 | 5.556891  | -3.195966 | 136      | C  | -8.229497  | -4.828361 | 2.970632  | 217 | H  | -9.582657  | 6.077408  | -1.823674 |
| 56                        | H    | 15.958805 | 6.111638  | -2.717514 | 137      | C  | -10.724311 | 2.262966  | 1.378781  | 218 | H  | -9.618335  | 4.373454  | -1.326574 |
| 57                        | H    | 17.566840 | 6.278156  | -3.447003 | 138      | C  | -4.409936  | 6.547116  | 0.231603  | 219 | H  | -8.774866  | 4.179632  | -4.984925 |
| 58                        | H    | 16.390985 | 5.145074  | -4.138673 | 139      | C  | -8.954698  | -5.188365 | 1.667083  | 220 | H  | -9.925255  | 3.645308  | -3.735945 |
| 59                        | C    | 16.777206 | -5.558167 | 3.195730  | 140      | C  | -9.260530  | -4.470745 | 4.046427  | 221 | H  | -9.901600  | 5.341039  | -4.247659 |
| 60                        | H    | 15.957234 | -6.112644 | 2.717415  | 141      | C  | -7.435215  | -6.041796 | 3.443459  | 222 | H  | -6.722662  | 6.386666  | -2.686714 |
| 61                        | H    | 17.565341 | -6.279691 | 3.446622  | 142      | C  | -10.849402 | 3.748121  | 1.725890  | 223 | H  | -6.891777  | 5.833150  | -4.372092 |
| 62                        | H    | 16.389977 | -5.146237 | 4.138511  | 143      | C  | -11.219423 | 2.046892  | -0.057720 | 224 | H  | -8.134033  | 6.869234  | -3.641198 |



Table S1. Cont.

| No.                                                             | Atom | X         | Y         | Z         | No. Atom | X  | Y          | Z         | No. Atom  | X   | Y  | Z          |           |           |
|-----------------------------------------------------------------|------|-----------|-----------|-----------|----------|----|------------|-----------|-----------|-----|----|------------|-----------|-----------|
| 63                                                              | C    | 7.205708  | -1.896748 | -5.100640 | 144      | C  | -11.617731 | 1.472550  | 2.336457  | 225 | H  | -10.369421 | -4.403533 | -0.978471 |
| 64                                                              | C    | 6.948914  | -2.638416 | -6.263840 | 145      | C  | -3.788898  | 6.766972  | -1.152111 | 226 | H  | -11.910786 | -4.026078 | -1.748409 |
| 65                                                              | C    | 6.138098  | -1.296527 | -4.422024 | 146      | C  | -3.533454  | 7.214257  | 1.298578  | 227 | H  | -10.416564 | -3.975537 | -2.708199 |
| 66                                                              | C    | 5.644945  | -2.772230 | -6.728226 | 147      | C  | -5.787335  | 7.200487  | 0.262572  | 228 | H  | -11.209325 | -0.986566 | 0.333298  |
| 67                                                              | H    | 7.776132  | -3.106426 | -6.794270 | 148      | H  | -8.238832  | -5.411724 | 0.860349  | 229 | H  | -12.250042 | -2.416902 | 0.157085  |
| 68                                                              | C    | 4.824835  | -1.439505 | -4.884078 | 149      | H  | -9.577061  | -6.080317 | 1.825125  | 230 | H  | -10.596275 | -2.595722 | 0.789131  |
| 69                                                              | H    | 6.330635  | -0.722733 | -3.516926 | 150      | H  | -9.613630  | -4.376458 | 1.327763  | 231 | H  | -12.634339 | -1.892306 | -2.300395 |
| 70                                                              | C    | 4.583933  | -2.183214 | -6.050086 | 151      | H  | -8.768761  | -4.182330 | 4.985876  | 232 | H  | -11.699326 | -0.416539 | -2.058219 |
| 71                                                              | H    | 5.452395  | -3.347411 | -7.631929 | 152      | H  | -9.920137  | -3.648813 | 3.737452  | 233 | H  | -11.257847 | -1.541660 | -3.368046 |
| 72                                                              | H    | 3.563883  | -2.294836 | -6.413123 | 153      | H  | -9.894990  | -5.344546 | 4.249101  | 234 | H  | -3.693315  | -7.844215 | 1.345488  |
| 73                                                              | C    | 7.206595  | 1.898617  | 5.100951  | 154      | H  | -6.716019  | -6.387729 | 2.686525  | 235 | H  | -2.779631  | -6.325623 | 1.226964  |
| 74                                                              | C    | 6.949582  | 2.640327  | 6.264074  | 155      | H  | -6.884773  | -5.834510 | 4.372038  | 236 | H  | -4.411522  | -6.331327 | 1.939964  |
| 75                                                              | C    | 6.139096  | 1.298500  | 4.422067  | 156      | H  | -8.126592  | -6.871458 | 3.641609  | 237 | H  | -3.941004  | -7.052084 | -2.308129 |
| 76                                                              | C    | 5.645507  | 2.774267  | 6.728127  | 157      | H  | -10.372153 | 4.399817  | 0.981524  | 238 | H  | -2.498000  | -6.835841 | -1.289130 |
| 77                                                              | H    | 7.776713  | 3.108269  | 6.794700  | 158      | H  | -11.912472 | 4.021373  | 1.753006  | 239 | H  | -3.490156  | -8.295203 | -1.119406 |
| 78                                                              | C    | 4.825725  | 1.441644  | 4.883760  | 159      | H  | -10.417317 | 3.972178  | 2.711401  | 240 | H  | -6.453242  | -6.788465 | 0.503866  |
| 79                                                              | H    | 6.331805  | 0.724691  | 3.517016  | 160      | H  | -11.210690 | 0.982054  | -0.328792 | 241 | H  | -6.268661  | -7.089673 | -1.243220 |
| 80                                                              | C    | 4.584604  | 2.185371  | 6.049712  | 161      | H  | -12.252039 | 2.411889  | -0.152106 | 242 | H  | -5.676547  | -8.275414 | -0.063755 |
| 81                                                              | H    | 5.452784  | 3.349468  | 7.631782  | 162      | H  | -10.598800 | 2.591444  | -0.785363 |     |    |            |           |           |
| Unfolded structure (all- <i>transoid</i> conformation) of (S)-2 |      |           |           |           |          |    |            |           |           |     |    |            |           |           |
| 1                                                               | C    | -4.189315 | 3.252905  | 0.393315  | 82       | H  | 10.815745  | -0.675619 | -2.238989 | 163 | H  | 26.070277  | -5.930781 | -0.486401 |
| 2                                                               | C    | -4.058650 | 3.971008  | -0.782247 | 83       | C  | -11.009769 | 0.614801  | -0.040850 | 164 | H  | 25.426988  | -4.701421 | 0.616877  |
| 3                                                               | C    | -2.870894 | 4.672524  | -1.079406 | 84       | C  | -11.988978 | 0.650185  | -0.759955 | 165 | H  | 24.426093  | -6.101699 | 0.167667  |
| 4                                                               | C    | -1.777940 | 4.645911  | -0.160429 | 85       | C  | 11.126668  | 1.025080  | -0.206413 | 166 | H  | 15.886953  | -5.845788 | -5.645962 |
| 5                                                               | C    | -1.933199 | 3.889345  | 1.033150  | 86       | C  | 12.162683  | 1.226669  | 0.396269  | 167 | H  | 15.459494  | -5.403663 | -3.983226 |
| 6                                                               | C    | -3.093799 | 3.217005  | 1.304450  | 87       | C  | -13.149646 | 0.690916  | -1.585376 | 168 | H  | 15.842764  | -4.137056 | -5.177855 |
| 7                                                               | H    | -3.561713 | 5.413821  | -2.989009 | 88       | C  | -13.100874 | 1.277259  | -2.860500 | 169 | H  | 18.948092  | -6.855162 | -3.825823 |
| 8                                                               | H    | -4.882204 | 4.003563  | -1.496127 | 89       | C  | -14.354452 | 0.149711  | -1.119715 | 170 | H  | 17.310388  | -6.964181 | -3.138693 |
| 9                                                               | C    | -2.731554 | 5.401894  | -2.282735 | 90       | C  | -14.244770 | 1.316305  | -3.648072 | 171 | H  | 17.595741  | -7.381446 | -4.843572 |
| 10                                                              | C    | -0.588061 | 5.364456  | -0.455684 | 91       | H  | -12.163298 | 1.696900  | -3.220694 | 172 | H  | 18.230340  | -3.872167 | -6.034684 |
| 11                                                              | H    | -1.106404 | 3.842647  | 1.741067  | 92       | C  | -15.509674 | 0.190484  | -1.910408 | 173 | H  | 19.500613  | -5.007349 | -5.522063 |
| 12                                                              | H    | -3.195057 | 2.643130  | 2.224550  | 93       | H  | -14.394146 | -0.305278 | -0.130642 | 174 | H  | 18.157106  | -5.578619 | -6.530016 |
| 13                                                              | C    | -0.500877 | 6.079013  | -1.646691 | 94       | C  | -15.440648 | 0.782549  | -3.183278 | 175 | C  | -16.736349 | -0.354823 | -1.423444 |
| 14                                                              | C    | -1.578621 | 6.085221  | -2.567211 | 95       | H  | -14.204405 | 1.771089  | -4.636170 | 176 | C  | -17.789829 | -0.821543 | -0.997455 |
| 15                                                              | H    | -1.502260 | 6.636083  | -3.501388 | 96       | C  | 13.380112  | 1.461922  | 1.097801  | 177 | Pt | -19.483769 | -1.571819 | -0.301956 |
| 16                                                              | C    | 0.559949  | 5.363354  | 0.487424  | 97       | C  | 14.535258  | 0.749174  | 0.753467  | 178 | N  | -20.817308 | -0.738272 | -1.618224 |
| 17                                                              | C    | 0.475182  | 6.076231  | 1.679508  | 98       | C  | 13.432157  | 2.404456  | 2.137542  | 179 | N  | -21.185121 | -2.328068 | 0.398898  |
| 18                                                              | C    | 1.749404  | 4.645332  | 0.188599  | 99       | C  | 15.740150  | 0.968780  | 1.433234  | 180 | N  | -18.766358 | -2.676999 | 1.269154  |
| 19                                                              | C    | 1.555988  | 6.083361  | 2.596495  | 100      | H  | 14.496380  | 0.016778  | -0.052246 | 181 | C  | -20.550685 | 0.078211  | -2.646426 |
| 20                                                              | C    | 2.845656  | 4.673747  | 1.103534  | 101      | C  | 14.625735  | 2.623603  | 2.813842  | 182 | C  | -22.116873 | -1.087069 | -1.368989 |
| 21                                                              | C    | 1.900566  | 3.886850  | -1.004271 | 102      | H  | 12.532872  | 2.957432  | 2.403086  | 183 | C  | -22.328030 | -1.996575 | -0.224317 |
| 22                                                              | C    | 2.709347  | 5.402674  | 2.307492  | 103      | C  | 15.771555  | 1.915992  | 2.470984  | 184 | C  | -21.126542 | -3.139303 | 1.462535  |
| 23                                                              | H    | 1.481751  | 6.633297  | 3.531396  | 104      | H  | 14.663381  | 3.355326  | 3.618910  | 185 | C  | -19.751231 | -3.337519 | 1.961513  |
| 24                                                              | C    | 4.033497  | 3.974205  | 0.801904  | 105      | H  | 16.706475  | 2.089020  | 3.002502  | 186 | C  | -17.498553 | -2.809288 | 1.667246  |
| 25                                                              | C    | 3.060215  | 3.213955  | -1.278499 | 106      | H  | -16.337187 | 0.817366  | -3.800926 | 187 | C  | -21.545945 | 0.581525  | -3.463844 |
| 26                                                              | H    | 1.071254  | 3.838720  | -1.709151 | 107      | C  | 16.912502  | 0.236224  | 1.075314  | 188 | H  | -19.502749 | 0.323336  | -2.802344 |
| 27                                                              | H    | 3.541977  | 5.415966  | 3.010825  | 108      | C  | 17.916257  | -0.397609 | 0.759254  | 189 | C  | -23.146206 | -0.602282 | -2.159329 |
| 28                                                              | C    | 4.159816  | 3.253643  | -0.372611 | 109      | Pt | 19.523353  | -1.427576 | 0.237665  | 190 | C  | -23.522948 | -2.517797 | 0.244205  |
| 29                                                              | H    | 4.860096  | 4.009155  | 1.512147  | 110      | N  | 20.898038  | -0.647904 | 1.545345  | 191 | C  | -22.302937 | -3.682600 | 1.966681  |
| 30                                                              | H    | 3.157972  | 2.638014  | -2.197676 | 111      | N  | 21.136507  | -2.463697 | -0.292884 | 192 | C  | -19.439913 | -4.124686 | 3.052026  |
| 31                                                              | O    | 0.643353  | 6.771174  | -1.844687 | 112      | N  | 18.733417  | -2.582826 | -1.262544 | 193 | C  | -17.139851 | -3.589227 | 2.757594  |
| 32                                                              | O    | -0.669601 | 6.766236  | 1.882139  | 113      | C  | 20.700930  | 0.292705  | 2.478859  | 194 | H  | -16.755266 | -2.267915 | 1.086349  |
| 33                                                              | C    | -5.387606 | 2.549687  | 0.697574  | 114      | C  | 22.145819  | -1.192030 | 1.408047  | 195 | C  | -22.884911 | 0.251456  | -3.234831 |
| 34                                                              | C    | -6.403549 | 1.943471  | 0.979936  | 115      | C  | 22.286184  | -2.219417 | 0.357118  | 196 | H  | -21.258067 | 1.236640  | -4.282915 |
| 35                                                              | C    | 5.358446  | 2.552179  | -0.680597 | 116      | C  | 21.018465  | -3.356744 | -1.283326 | 197 | H  | -24.164169 | -0.899554 | -1.924009 |
| 36                                                              | C    | 6.375314  | 1.948743  | -0.965458 | 117      | C  | 19.650270  | -3.430816 | -1.833296 | 198 | C  | -23.524359 | -3.376851 | 1.355943  |
| 37                                                              | C    | 0.919229  | 7.355315  | -3.114937 | 118      | C  | 17.476659  | -2.593487 | -1.714014 | 199 | H  | -24.456353 | -2.264726 | -0.253930 |
| 38                                                              | H    | 0.059741  | 7.947518  | -3.465840 | 119      | C  | 21.716287  | 0.728147  | 3.310652  | 200 | H  | -22.263384 | -4.343257 | 2.827929  |
| 39                                                              | H    | 1.734174  | 8.063587  | -2.919275 | 120      | H  | 19.692980  | 0.695291  | 2.545996  | 201 | C  | -18.113008 | -4.271700 | 3.483656  |
| 40                                                              | C    | -0.942459 | 7.347332  | 3.154474  | 121      | C  | 23.192242  | -0.787335 | 2.220435  | 202 | H  | -20.246423 | -4.632883 | 3.576431  |
| 41                                                              | H    | -0.083419 | 7.941567  | 3.503064  | 122      | C  | 23.425014  | -2.919879 | -0.004249 | 203 | H  | -16.087384 | -3.645468 | 3.019433  |
| 42                                                              | H    | -1.760256 | 8.053477  | 2.963096  | 123      | C  | 22.136346  | -4.084204 | -1.676306 | 204 | C  | -23.977939 | 0.806906  | -4.133300 |
| 43                                                              | C    | -1.366205 | 6.318710  | 4.181430  | 124      | C  | 19.282033  | -4.284202 | -2.854105 | 205 | C  | -24.848048 | -3.940743 | 1.854858  |

Table S1. Cont.

| No. | Atom | X          | Y         | Z         | No. Atom | X | Y         | Z         | No. Atom  | X   | Y | Z          |           |           |
|-----|------|------------|-----------|-----------|----------|---|-----------|-----------|-----------|-----|---|------------|-----------|-----------|
| 44  | H    | -2.271644  | 5.806968  | 3.817621  | 125      | C | 17.062977 | -3.432468 | -2.739242 | 206 | C | -17.799700 | -5.135244 | 4.693613  |
| 45  | H    | -0.588308  | 5.544270  | 4.283668  | 126      | H | 16.788703 | -1.903052 | -1.231272 | 207 | C | -23.932055 | 2.338557  | -4.084863 |
| 46  | C    | 1.350011   | 6.329505  | -4.141671 | 127      | C | 23.001820 | 0.189196  | 3.202164  | 208 | C | -25.368140 | 0.348121  | -3.705639 |
| 47  | H    | 2.255447   | 5.819909  | -3.774844 | 128      | H | 21.485930 | 1.495052  | 4.046721  | 209 | C | -23.722671 | 0.328337  | -5.567114 |
| 48  | H    | 0.574742   | 5.552960  | -4.247936 | 129      | H | 24.165149 | -1.249960 | 2.078721  | 210 | C | -24.669637 | -4.859044 | 3.059729  |
| 49  | C    | -1.632170  | 6.959240  | 5.535741  | 130      | C | 23.362798 | -3.870640 | -1.037013 | 211 | C | -25.761024 | -2.778250 | 2.262045  |
| 50  | H    | -2.375388  | 7.764367  | 5.418677  | 131      | H | 24.364313 | -2.726857 | 0.509332  | 212 | C | -25.504496 | -4.742993 | 0.725093  |
| 51  | H    | -0.709792  | 7.445132  | 5.892788  | 132      | H | 22.049446 | -4.809659 | -2.479761 | 213 | C | -16.304564 | -5.183741 | 4.991440  |
| 52  | C    | 1.619621   | 6.972772  | -5.493950 | 133      | C | 17.965732 | -4.307304 | -3.339106 | 214 | C | -18.293419 | -6.562566 | 4.432509  |
| 53  | H    | 2.359024   | 7.780764  | -5.372487 | 134      | H | 20.035807 | -4.943858 | -3.279053 | 215 | C | -18.524821 | -4.554400 | 5.913121  |
| 54  | H    | 0.696937   | 7.455298  | -5.854757 | 135      | H | 16.024001 | -3.382860 | -3.051420 | 216 | H | -22.974384 | 2.737559  | -4.444196 |
| 55  | C    | -2.119143  | 5.954056  | 6.564611  | 136      | C | 24.114926 | 0.664852  | 4.121110  | 217 | H | -24.725564 | 2.749916  | -4.724284 |
| 56  | H    | -1.384206  | 5.149569  | 6.710996  | 137      | C | 24.625915 | -4.625289 | -1.429916 | 218 | H | -24.094320 | 2.707388  | -3.062383 |
| 57  | H    | -2.296385  | 6.423814  | 7.540669  | 138      | C | 17.587553 | -5.251540 | -4.467809 | 219 | H | -25.472054 | -0.745223 | -3.747965 |
| 58  | H    | -3.060323  | 5.485204  | 6.244149  | 139      | C | 24.323414 | 2.168129  | 3.905469  | 220 | H | -25.617353 | 0.682236  | -2.688571 |
| 59  | C    | 2.115575   | 5.970850  | -6.521658 | 140      | C | 25.433486 | -0.053725 | 3.853680  | 221 | H | -26.114820 | 0.776695  | -4.387257 |
| 60  | H    | 1.384711   | 5.163462  | -6.672389 | 141      | C | 23.701155 | 0.406478  | 5.574382  | 222 | H | -22.749498 | 0.665572  | -5.947771 |
| 61  | H    | 2.295356   | 6.442482  | -7.496347 | 142      | C | 24.374295 | -5.635047 | -2.545737 | 223 | H | -23.752611 | -0.768579 | -5.629027 |
| 62  | H    | 3.057227   | 5.505583  | -6.197390 | 143      | C | 25.671763 | -3.614614 | -1.915395 | 224 | H | -24.500255 | 0.727780  | -6.233132 |
| 63  | C    | -7.589085  | 1.232166  | 1.320880  | 144      | C | 25.162923 | -5.377351 | -0.207011 | 225 | H | -24.232052 | -4.331683 | 3.918957  |
| 64  | C    | -7.651170  | 0.494428  | 2.515019  | 145      | C | 16.109893 | -5.144910 | -4.830548 | 226 | H | -25.652066 | -5.237647 | 3.371587  |
| 65  | C    | -8.704591  | 1.266332  | 0.475105  | 146      | C | 17.882825 | -6.692792 | -4.036713 | 227 | H | -24.039019 | -5.728252 | 2.825880  |
| 66  | C    | -8.809527  | -0.194745 | 2.850467  | 147      | C | 18.422962 | -4.902703 | -5.705218 | 228 | H | -25.980629 | -2.105076 | 1.422847  |
| 67  | H    | -6.782937  | 0.470743  | 3.171257  | 148      | H | 23.419881 | 2.747766  | 4.135886  | 229 | H | -26.717841 | -3.174890 | 2.629381  |
| 68  | C    | -9.871786  | 0.572137  | 0.815230  | 149      | H | 25.127661 | 2.525716  | 4.563549  | 230 | H | -25.308096 | -2.183731 | 3.067798  |
| 69  | H    | -8.664819  | 1.837648  | -0.450827 | 150      | H | 24.612256 | 2.382946  | 2.867063  | 231 | H | -26.460781 | -5.155328 | 1.075981  |
| 70  | C    | -9.917027  | -0.160753 | 2.012760  | 151      | H | 25.351904 | -1.137956 | 4.014647  | 232 | H | -25.712966 | -4.124846 | -0.158072 |
| 71  | H    | -8.849936  | -0.764094 | 3.777081  | 152      | H | 25.796738 | 0.119969  | 2.831009  | 233 | H | -24.866626 | -5.581764 | 0.413055  |
| 72  | H    | -10.826582 | -0.698925 | 2.273660  | 153      | H | 26.197689 | 0.326641  | 4.544390  | 234 | H | -16.132129 | -5.821312 | 5.868753  |
| 73  | C    | 7.564910   | 1.241764  | -1.302427 | 154      | H | 22.788400 | 0.951822  | 5.847969  | 235 | H | -15.733559 | -5.609758 | 4.154664  |
| 74  | C    | 7.564285   | 0.315208  | -2.358507 | 155      | H | 23.527321 | -0.663875 | 5.753723  | 236 | H | -15.897989 | -4.188650 | 5.219580  |
| 75  | C    | 8.748633   | 1.471233  | -0.590397 | 156      | H | 24.502861 | 0.738390  | 6.248765  | 237 | H | -19.376949 | -6.602734 | 4.260033  |
| 76  | C    | 8.727676   | -0.368631 | -2.688036 | 157      | H | 24.023822 | -5.151506 | -3.468316 | 238 | H | -17.790821 | -7.002669 | 3.559918  |
| 77  | H    | 6.643250   | 0.139505  | -2.911473 | 158      | H | 25.314158 | -6.151720 | -2.781130 | 239 | H | -18.071436 | -7.192050 | 5.305537  |
| 78  | C    | 9.920695   | 0.782673  | -0.924901 | 159      | H | 23.641049 | -6.399255 | -2.252008 | 240 | H | -18.199024 | -3.524161 | 6.113992  |
| 79  | H    | 8.757956   | 2.190824  | 0.226689  | 160      | H | 25.946294 | -2.893408 | -1.134527 | 241 | H | -19.615317 | -4.549505 | 5.784292  |
| 80  | C    | 9.902396   | -0.141953 | -1.982110 | 161      | H | 26.585444 | -4.146913 | -2.214691 | 242 | H | -18.296141 | -5.162269 | 6.799702  |
| 81  | H    | 8.718856   | -1.086364 | -3.506197 | 162      | H | 25.304303 | -3.053705 | -2.786153 |     |   |            |           |           |
